# Supplementary material
Source: Springer Nature journal article supplement (https://www.springermedizin.de/resource/supplementary/12984_2008_143_MOESM6_ESM.pdf/9605394)

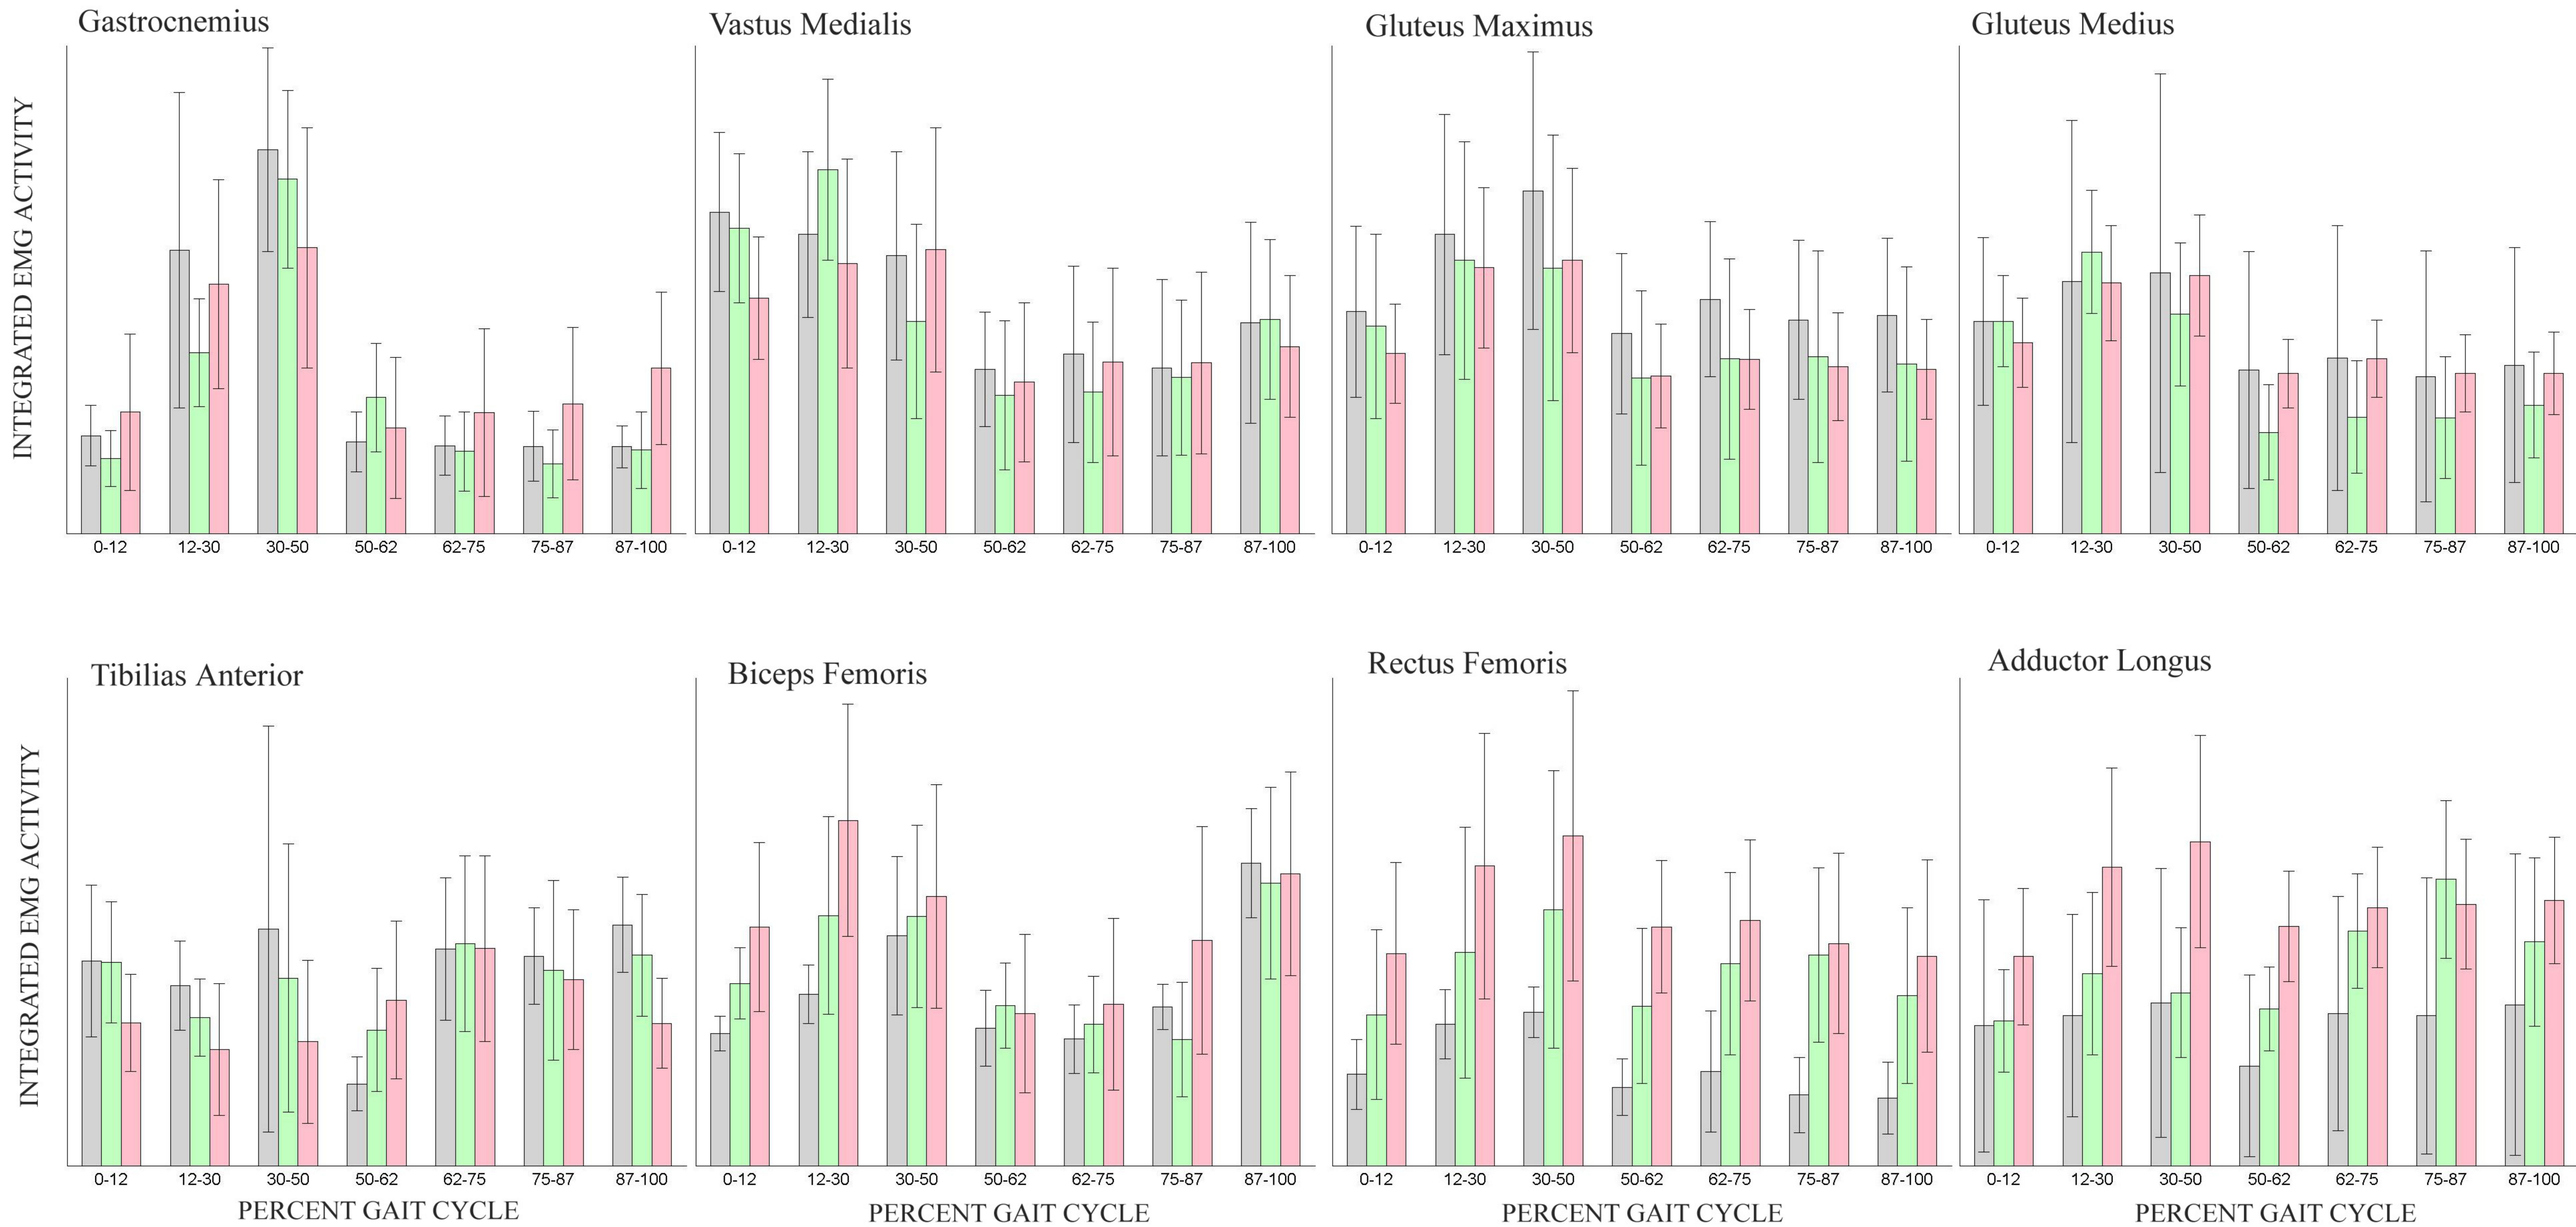

Supplement: MOESM6 [file 9605394]
